# Supplementary material
Source: PubMed Central journal article supplement (PMC7855373)
Supplement: NIHMS1634436-supplement-2.pdf [file NIHMS1634436-supplement-2.pdf]

# Long Term Cocaine Self-administration Produces Structural Brain Changes That Correlate With Altered Cognition

## Supplemental Information

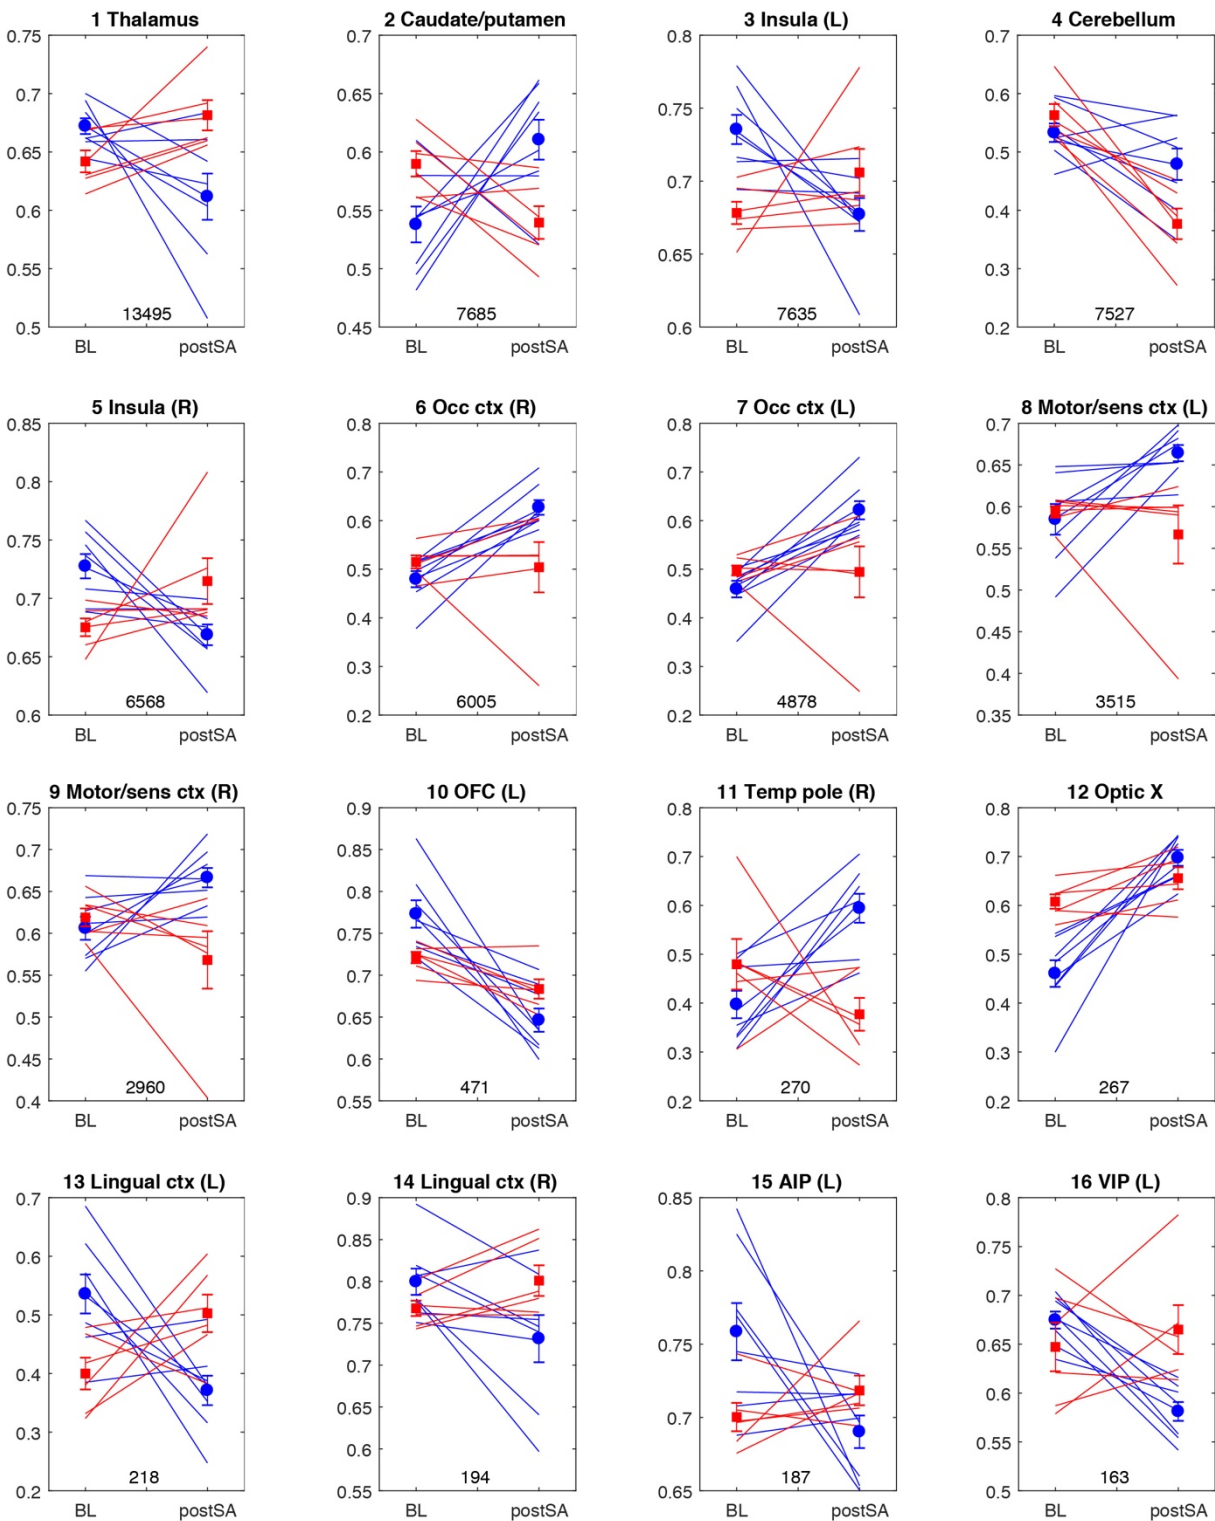

**Fig S1** Individual values for GMD in each cluster determined from Baseline scan 1 (BL) and Self-Administration scan 2 (post-SA). The number of voxels in the cluster is at the center bottom of each figure.
